# Supplementary material for: Impact of collection conditions on the metabolite content of human urine samples as analyzed by liquid chromatography coupled to mass spectrometry and nuclear magnetic resonance spectroscopy
Source: PubMed Central journal article supplement (PMC4559108; doi:10.1007/s11306-014-0764-5), 2014-12-23

## Acetic acid

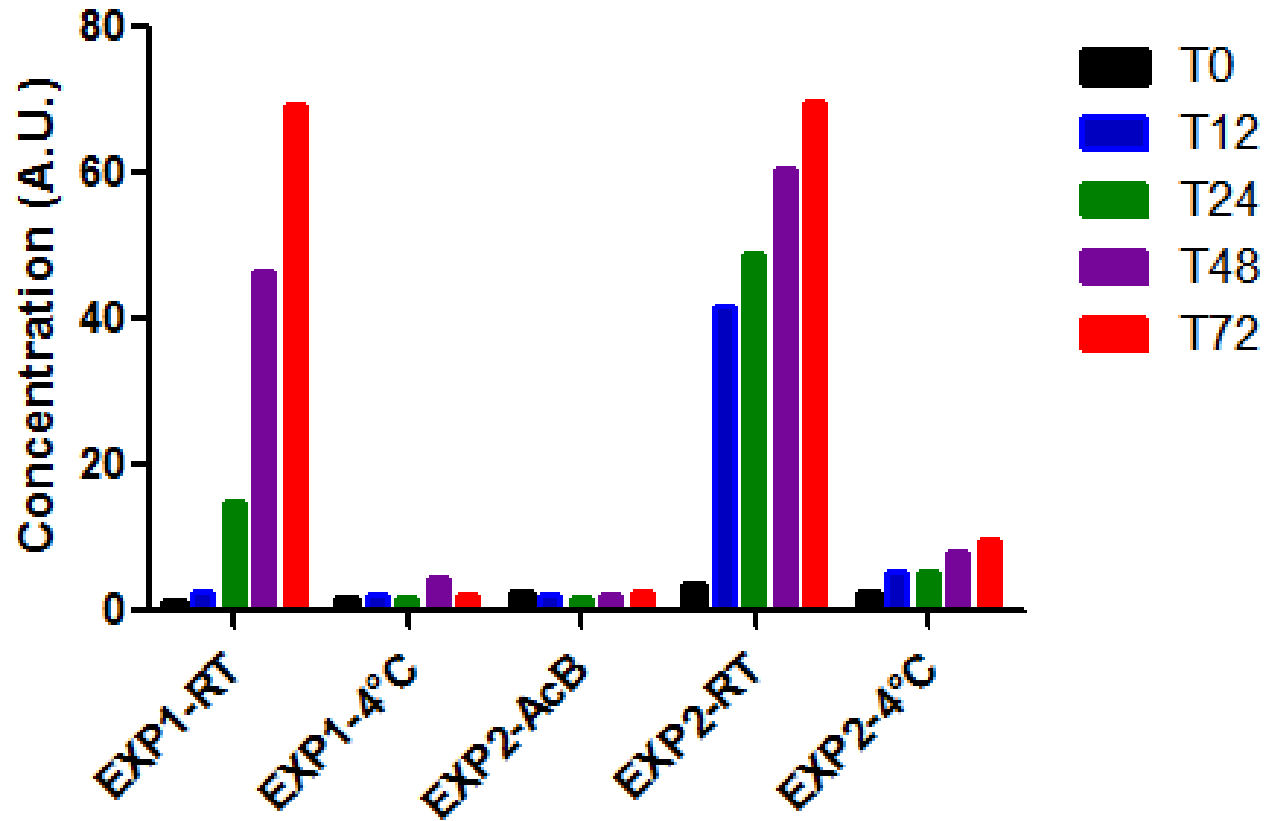

## Formic acid

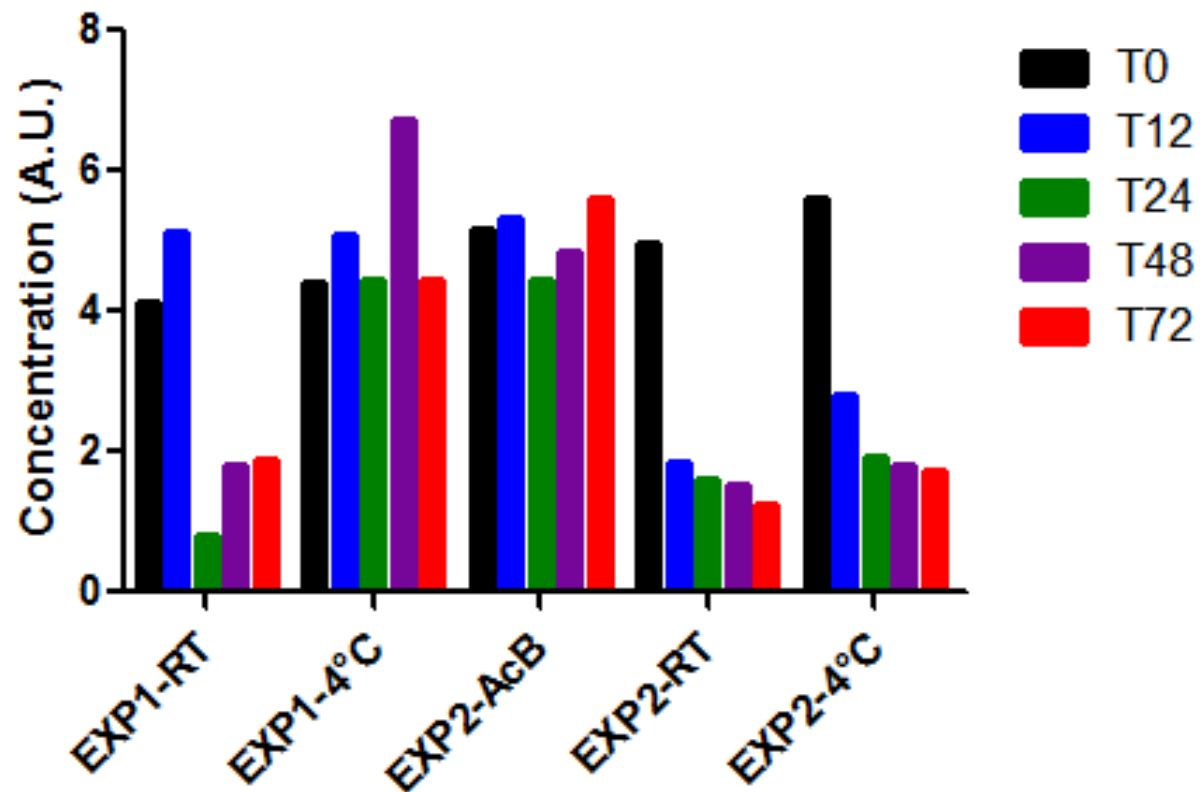

## Succinic acid

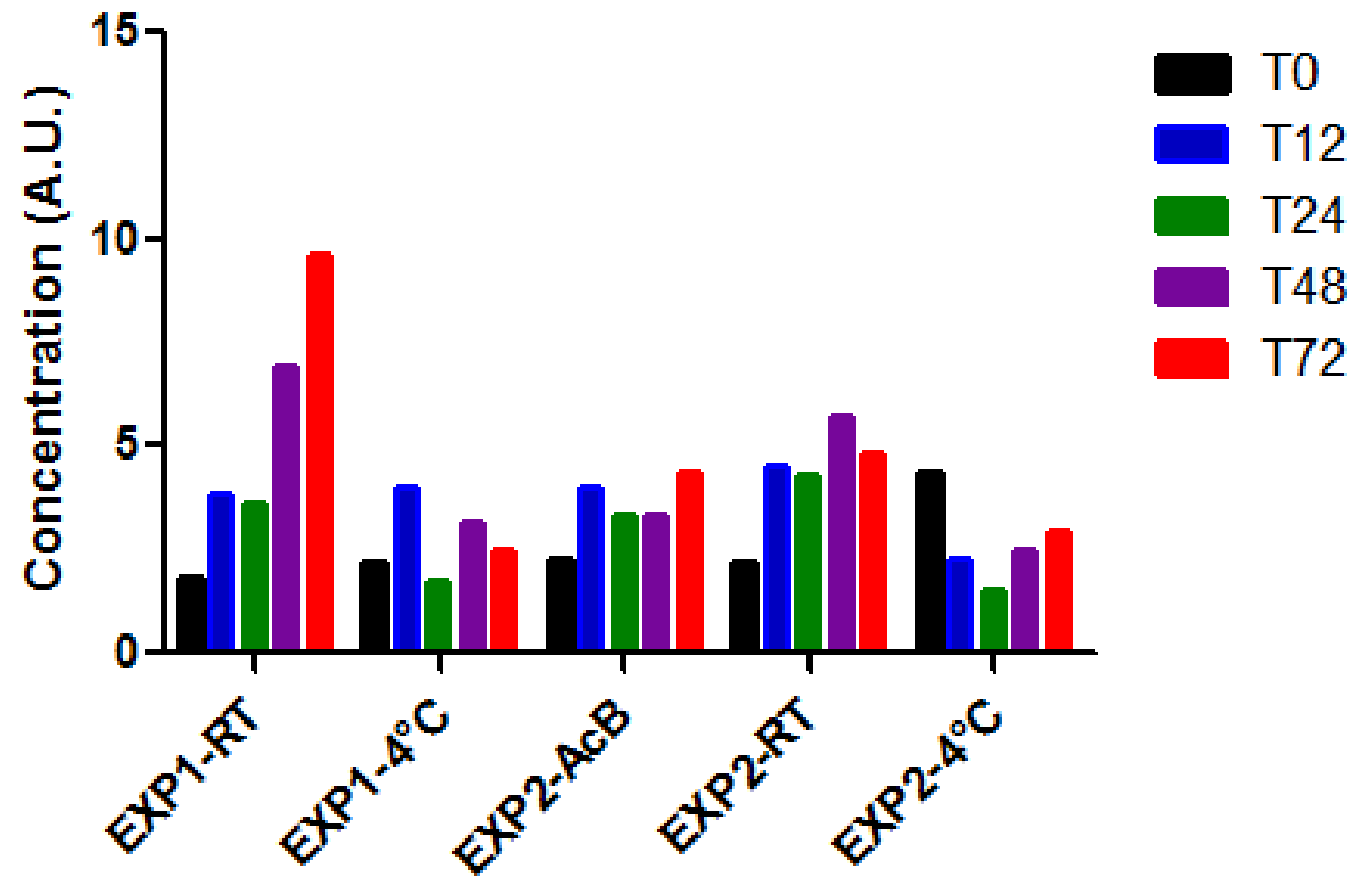

## Lactic acid

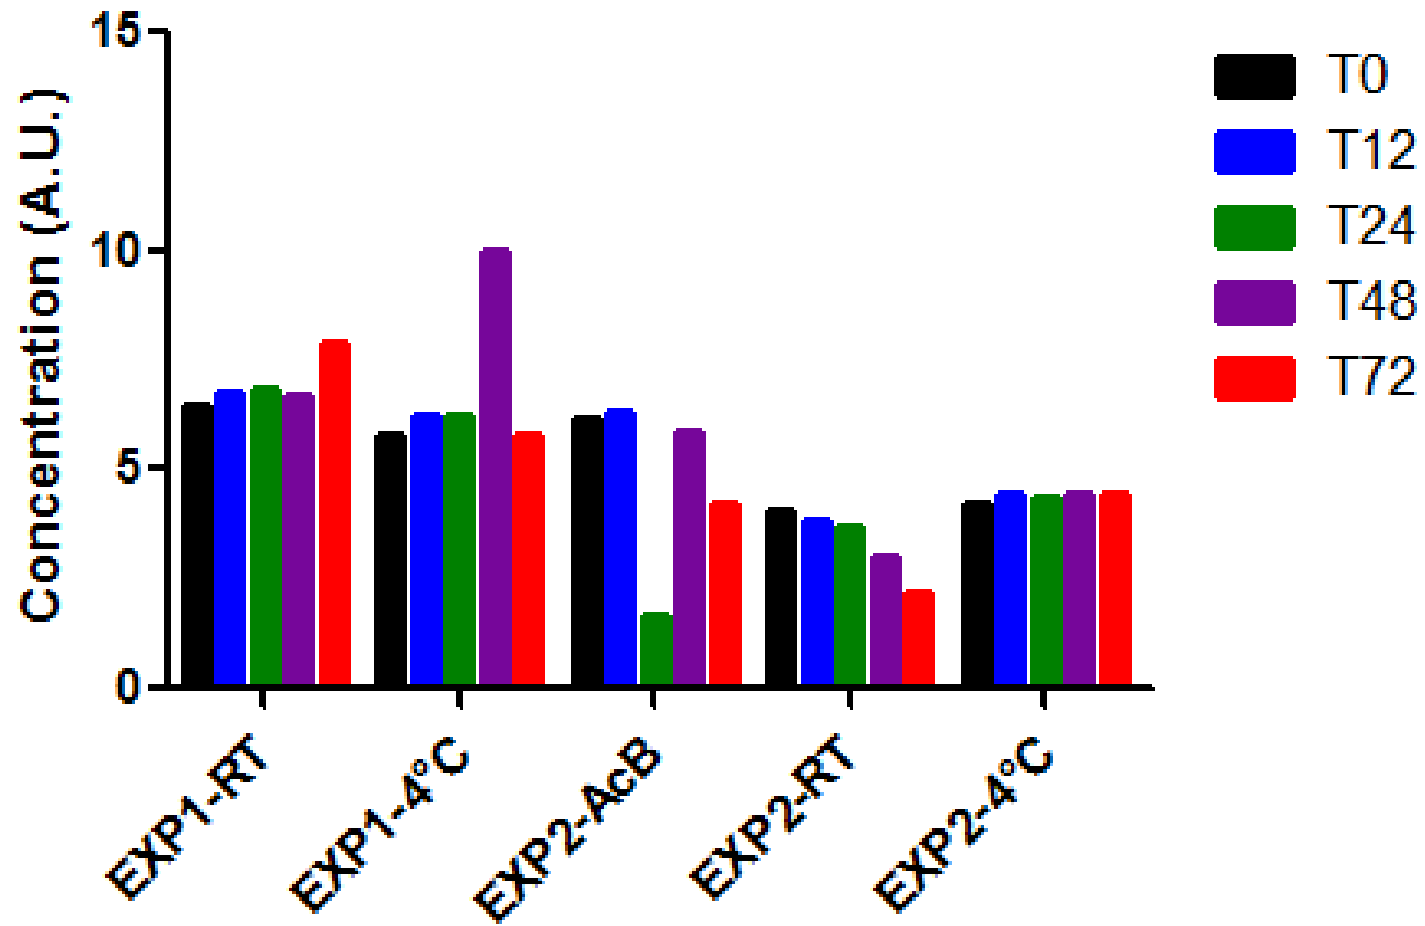

# Citric acid

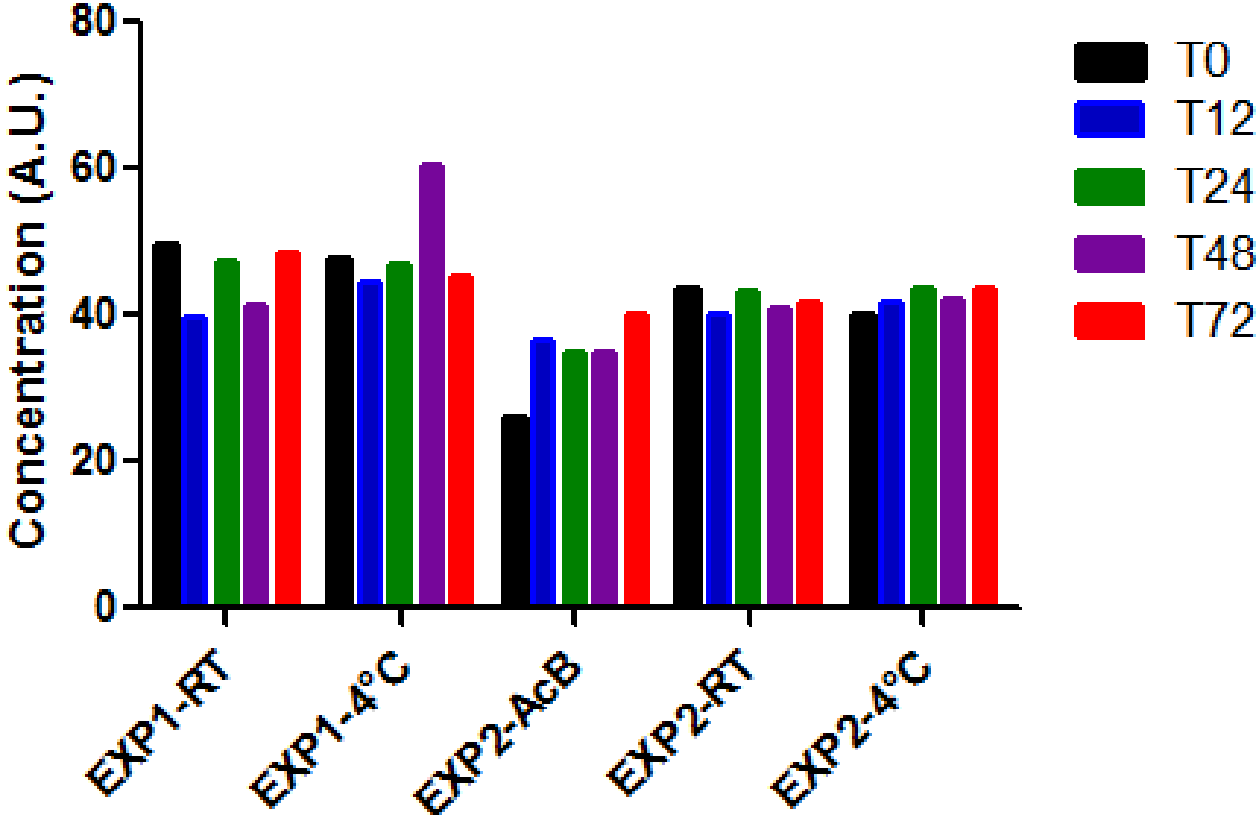

## Malonic acid

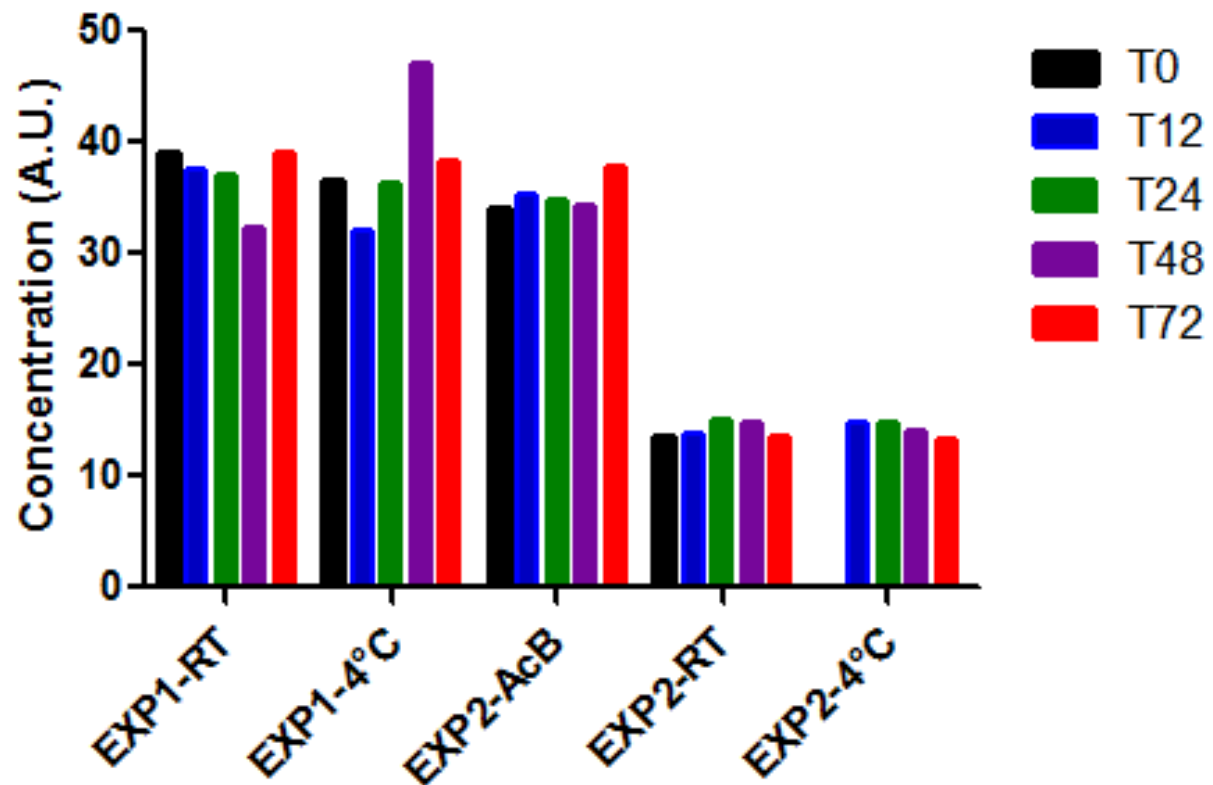

## Creatine

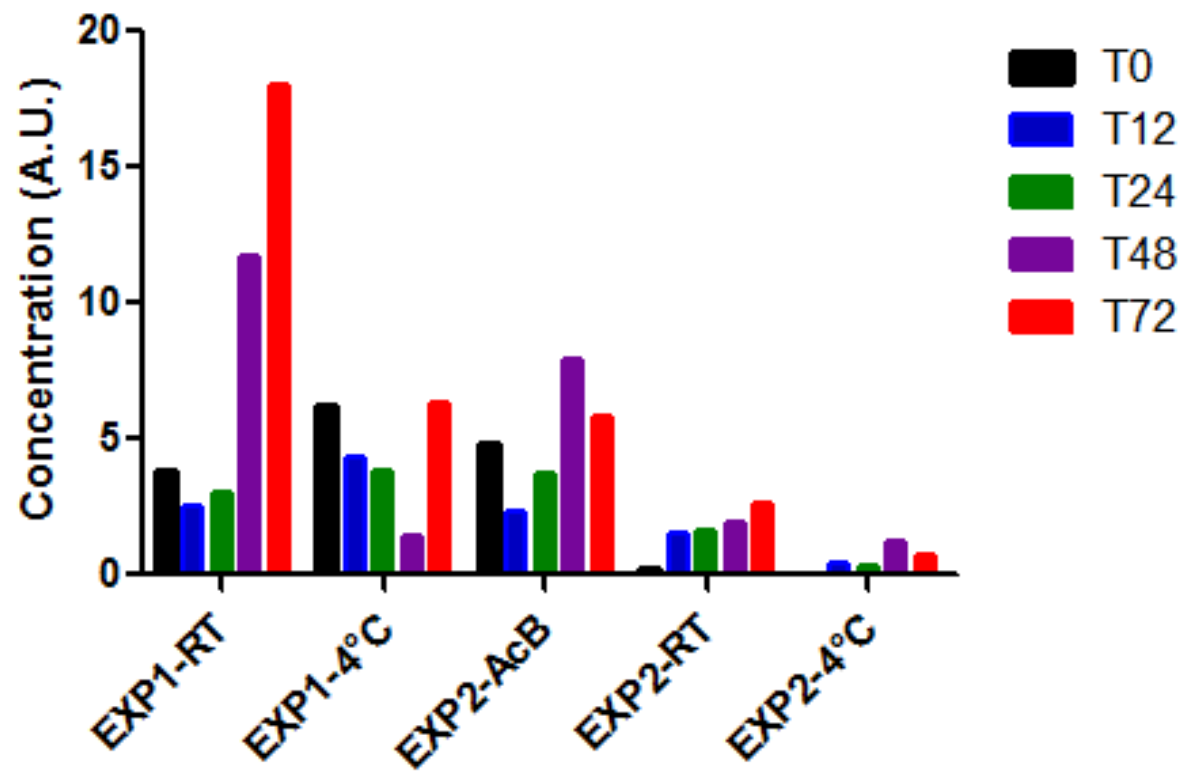

# Creatinine

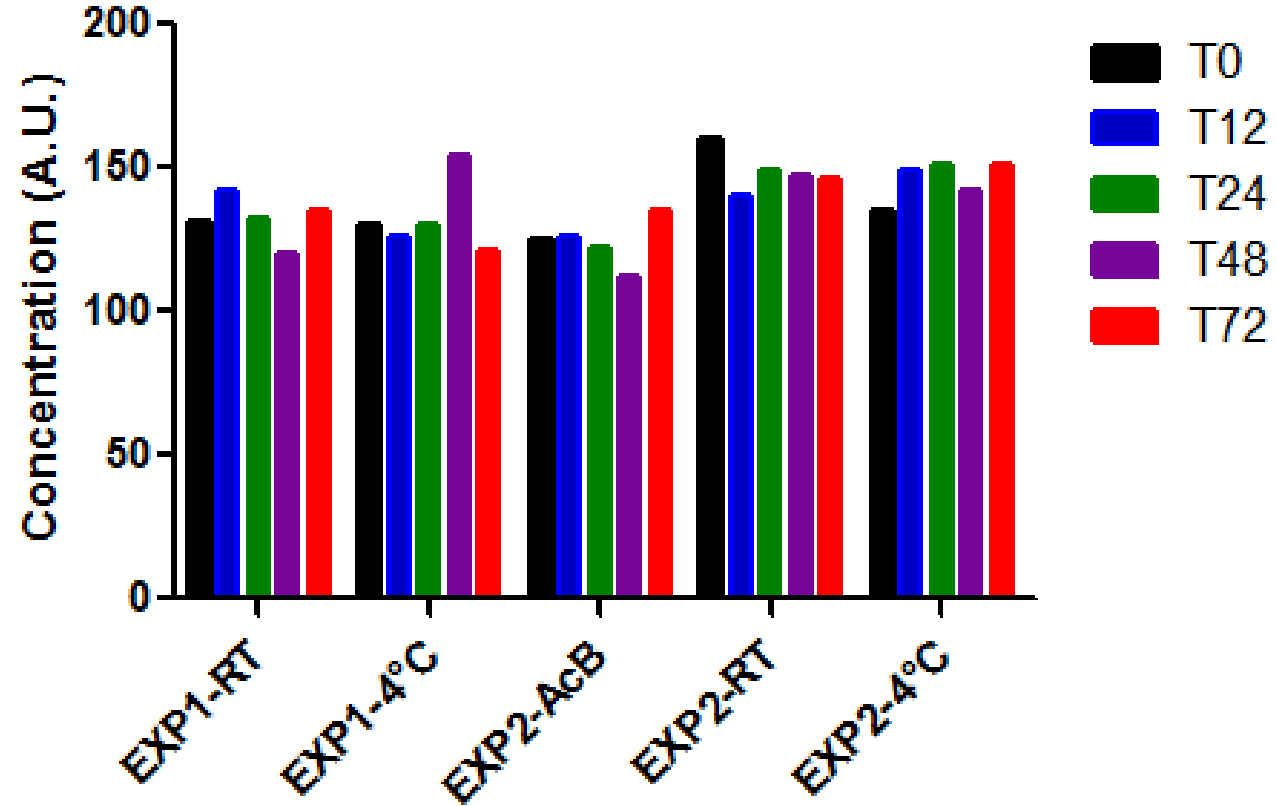



## Trimethylamine

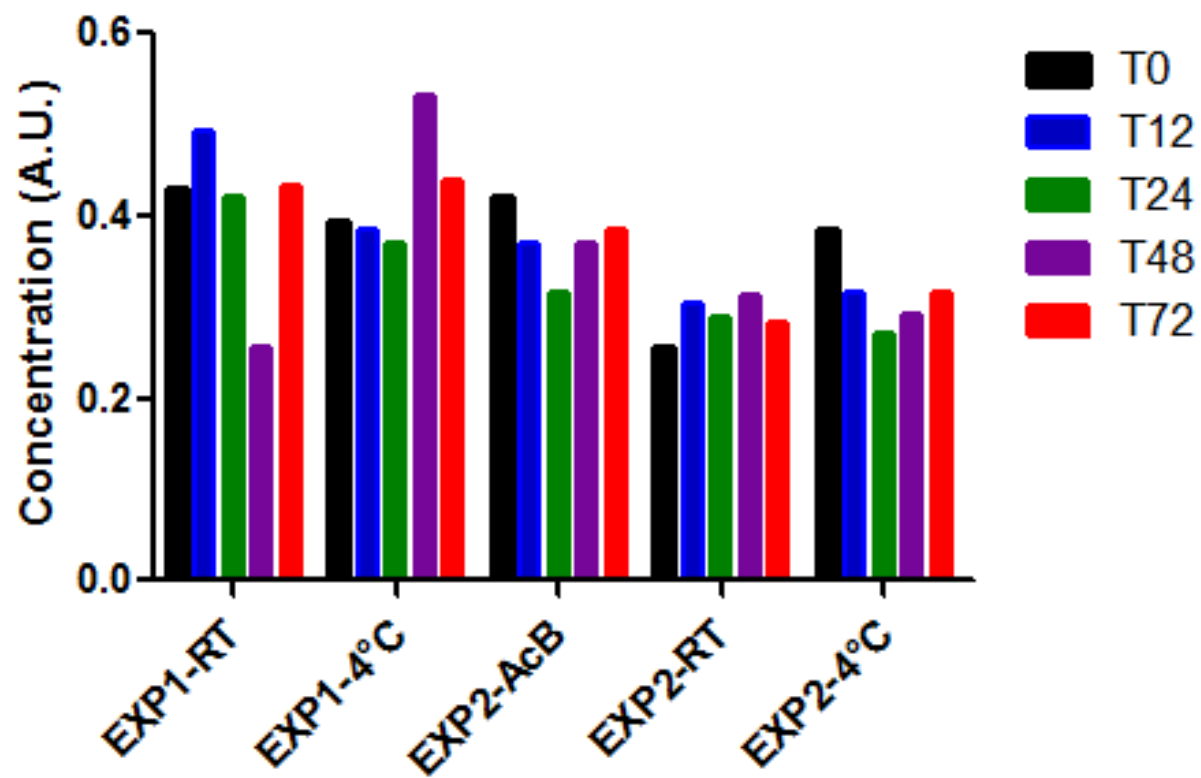

## Trimethylamine N-oxide

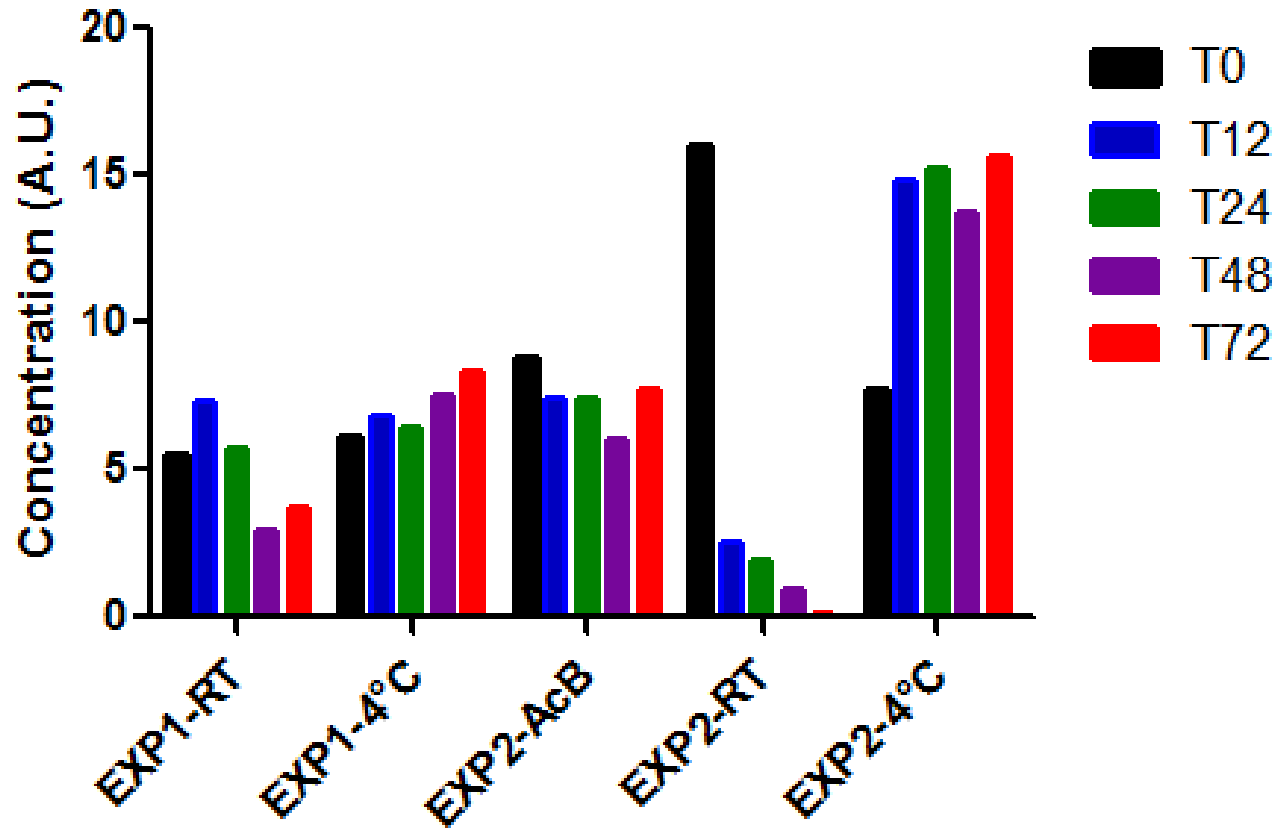

## Alanine

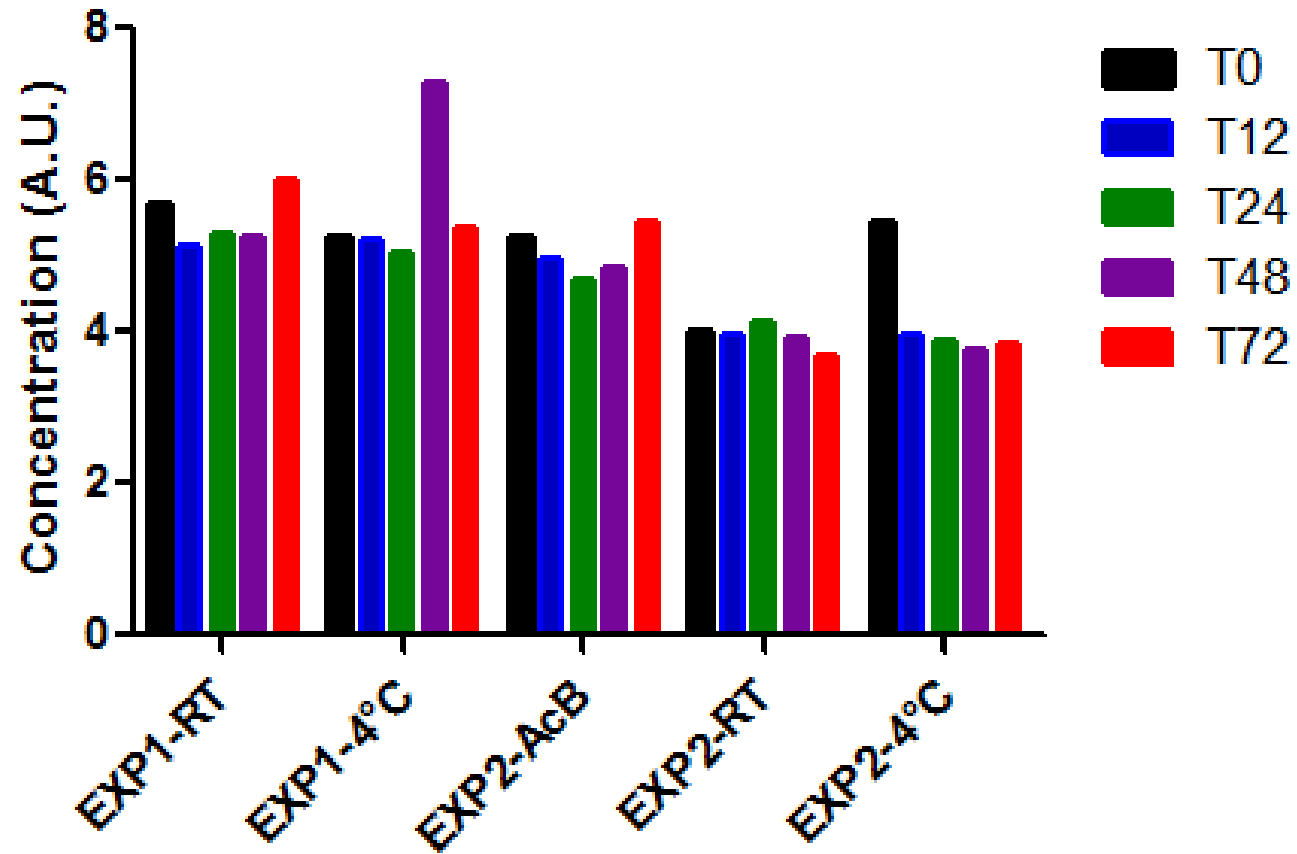

## Glycine

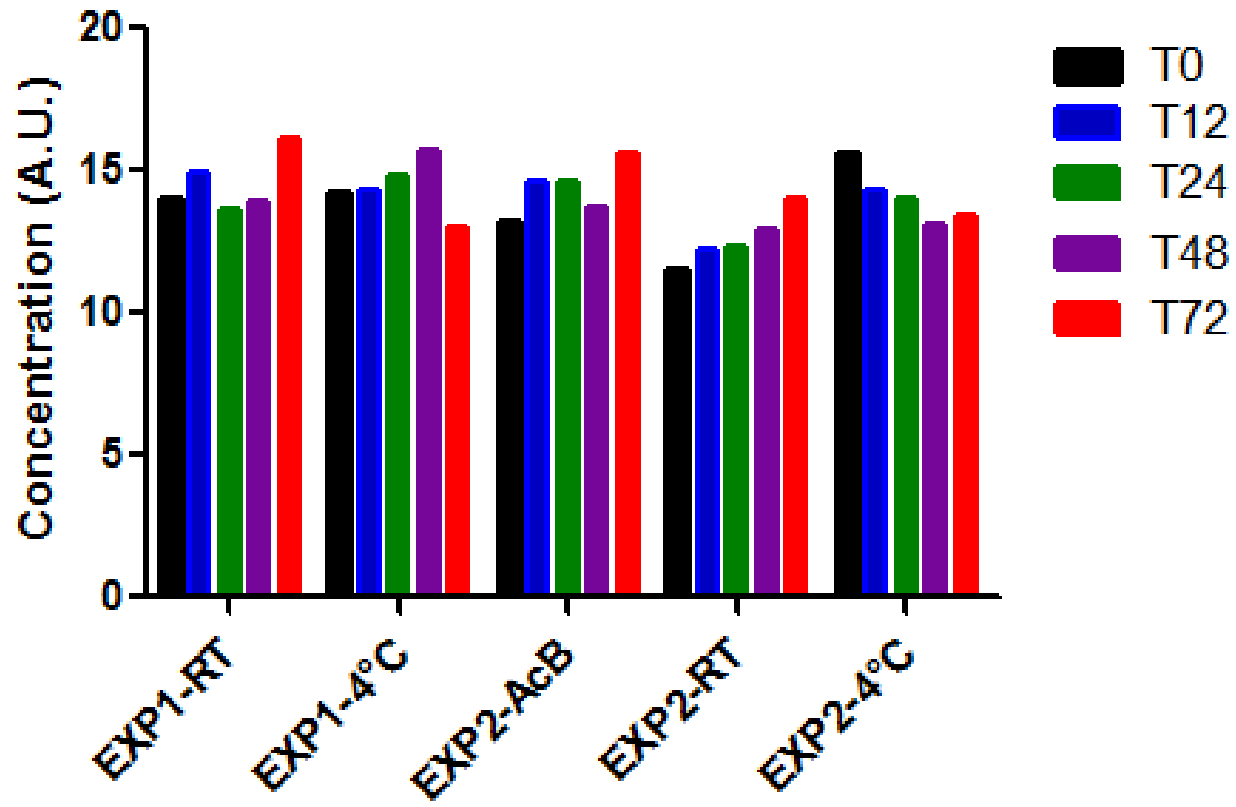

## Hippuric acid

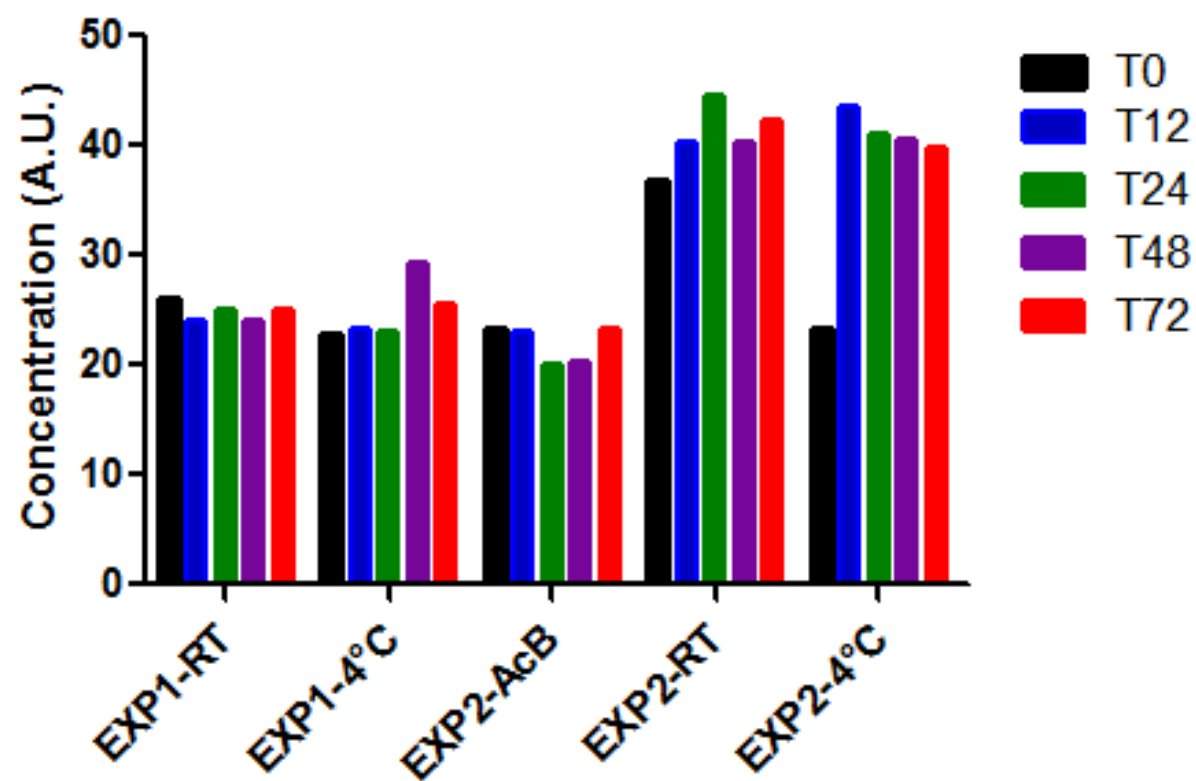

Supplement: 11306_2014_764_MOESM5_ESM.pdf [file 11306_2014_764_MOESM5_ESM.pdf]
